# Supplementary material
Source: PubMed Central journal article supplement (PMC11113355)
Supplement: 18_2012_1218_MOESM2_ESM.pdf [file 18_2012_1218_MOESM2_ESM.pdf]

# Supplementary Figures S1-13

## S1

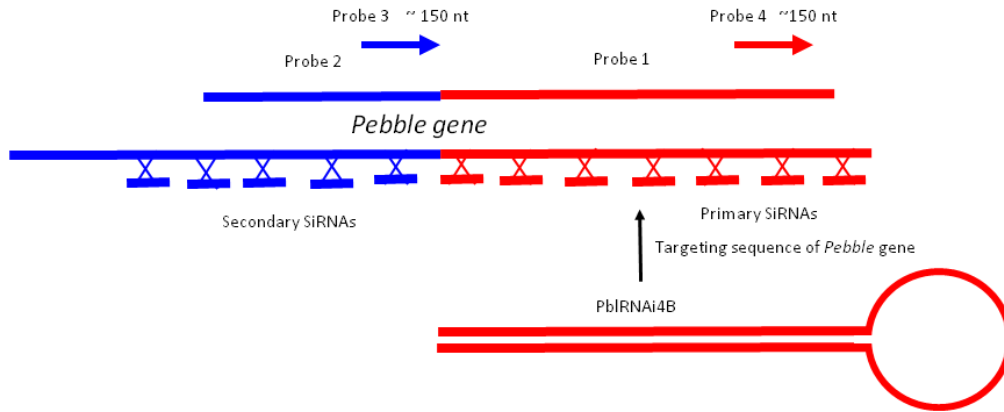

## S2

ATGGAATGGAGACCATTGAAGAGCAATCGAAGTGCGAGATGTCCATAAC  
 AACGCTGCCACGCGCATCTGCCTGGTGGGAGGCGTTGGCCAGGATGCGG  
 ACACGCTGCAGGCAGCCGAATCCTTTGGCCTGCCCATCGTTACGTCGGAC  
 ACGGGTCTGGACATTCTCGGAGAGTCGTCCGACTGGCGGACATTCTACGT  
 GCTGGATGACTTCGAGGGTGCCAGCTTCGAGGCGATACACAAGCAAAAGG  
 AATGCATTCTGGGACCGCCGGCTTTGAAGTACGCGGCCGAGATGAAACAG  
 AACTGGGCCAGAACTCGCGGCCATTTACAATTACGCGATGCGCGGCGT  
 GGTCACTTGTTTTACAGGCATACGCAAGAAGGATGAGCTGACAAAGCTGG  
 TCAATCTCATTCACTCGATGGGTGGCTGCATCAAGAAGGACCTGAACACG  
 AAGACCACGCATTTGATTTGCAACCACAGTGGCGGCGAAAAGTACCAGTA  
 CGCCAAAACCTTTCGGTTGACCGTGGTTCGTCCTGCTTGGGTGTTTGCCG  
 CTTGGGCGGATCGTAATTCGCTGGAGTTCGATGCCACGCAAGAGAATTTT  
 ACCAAGACGCATCGCCTGAAGGCATTCGAGGGTCAAAGATTTGCTTCTT  
 TGGATTCCTGTGGAGGAGCATCAGCATATGGTGGATGTACTTTTAGAAA  
 ACGGAGGCGTTTTCGCGCCGAGCTCGATGATCCGGAGTGCTCGCATGTCGTG  
 GTTGACGAGCACACGACTTTGACGAAGCCGGAGCCGAAGAATAATCACAC  
 TCATATCCTGAAATCAGACTGGTTCTGGTATACCATACAGAATGGCTATG  
 CCAATGAGATGGACTATCTGTTTGGCGACTATTTGGATAGCATCACGAAT  
 ACACCGAACACAGATCGTCGGGATTCATTGCCCATTAGCTTTAACAAAAG  
 GAAACGCAAGCGTTTTTTCGCAACGCATCCAGCTGGAGGGTACTCCGTTGG  
 GTTCTGGTAAACGACGCTCCTCCGTTTTCGGATGCCGGTCTATTGTCTGTC  
 TCAAATAGTTTATTTCGATTGTACCACCAGTCCGGATAAACTGGAGTCGGA

CAAGCTGTTGCATGCCGAGCCGGAGGCGAGCGATGCCACTCCAGCCAAGA  
 AATCGATGCGCTTTAATCACTTTATGGACTTTTATAACCACAGAGTCCAAC  
 TACGTGGGCATATTGGACACCATACTGAATCTTTTTTAAAAACAAGTTGGA  
 AGAGTTGGCTGAAACCAATGATCCGCTGCTTAATAAGTCGGAGATCAAGA  
 CGATCTTTGGCAACTTCTGCCTATCCACGAGGTACACCAAAGCATGCTG  
 GAGCATCTGCGGAAATTGCATGCTAACTGGCGGGAGGATTGTCTTATTGG  
 AGACATTATCATTTCAACATCGCGACGAGCTGATAAAGGCGTATCCACCAT  
 ACGTCAACTTCTTCGAGCAGATGAAGGAGCAACTGCAGTACTGCGATCGG  
 GAATATCCGCGTTTTCCACGCCTTTCTGAAGATTAATCAAACGAAACCGGA  
 GTGCGGACGCCAAGGTCTACAAGATCTGATGATCCGTCCAGTTCAGCGAT  
 TGCCCAGTATCAGTCTGCTGCTAAATGATATATTGAAACATACGACAAGT  
 GGCAATGCGGACCACGGACGTTTGGAGGAGGCTCTGAAGGCCATCAAGCA  
 GGTGACACTGCACATCAACGAGGATAAAAGGCGGACCGAATCGCGCATGG  
 CCATCTTCGATATATTCA**ACGATATCGAAGGATGTCCGGCGCATTTAGTG**  
**AGTTCCAACCGCAGCTTTATTTTGAAGTGTGAGGTGAACGAGCTCTCCGA**  
**TTGCTGAGCGGTCGTGGTGATAGCCTGGTCCTGTACCTGTTCTCCGATT**  
**CCATTGAGCTATGCAAGCGGCGTTCTAAAGGATTCAACACTGCAAAAATCG**  
**CCAAGCACGGCCAAGACGCATAAGCATCTCAAGCTGATATCTTTGAATAC**  
**GATCCGGTTAGTGATTGACATCTCGGATAGTCCAAGAGCTTTTGGTTTGC**  
**TCTTGCGGGGCGATAAGGAGAAGCTCTATACGTTTACGATCAGTGATGAG**  
**GAGACAGATAAGTCGGTCTACGTAAAGAAATTTGTGCAACCAGATTGCAGC**  
**CCACACCTGCCGTACTGATGCGGACAAACTTTTGATTTGTGCGCACCTCCC**  
**AGGAACTGGAGGTGGACATAAGTGATGTGAATGTCAGCACGCTCAGCAA**  
**GCCTTTAAACTGGCGGCCAAAACGCGACTCAAGGTGGGTCTGTCTTTCTC**  
**CTTTAACAAAACGCCCAACAAACTGAAACGGGCGGTATCCACGATGATGA**  
**CTTCGCCGTTTGGCAGCACCAACTCTCTAACACCTGCCTCTCAATTGGCC**  
**CAGATGCGTTTGGCCAGCTGCACGAATATAAATGAGGTTGATGATGAGGA**  
**CTGTGCAAGCATGCGA**AGCAGTTTCGCCGTCAACACAATCCGAGATGCTAG  
 TGGTACCGCCACTTTTCGGTGCAACCCACGCGGAAAAACAAGGCCGTTGTG  
 GGCCGCATTTAG

### S3

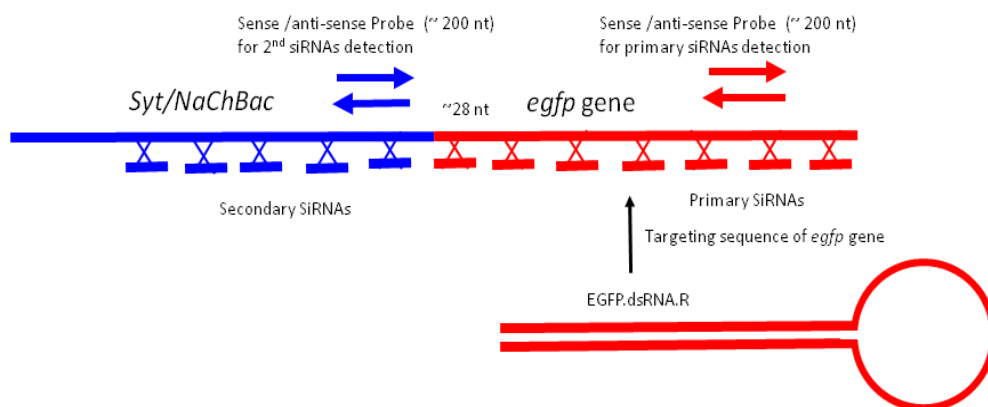

# S4

GAATTCC**ATG**AAAATGGAAGCTAGACAGAAACAGAACAGtTTCCTAGTAAAATGCAAAAAA  
 TCGTGAATCATCGGGCGTTTACGTTTACGGTGATCGCGTTAATTCTTTTTAATGCCCTTATC  
 GTTGAATCGAAACCTATCCACGTATTTATGCTGATCATAAATGGTTATTCTATCGAATAGA  
 TCTTGTTCTTCTCTGGATCTTCACGATTGAAATTGCGATGCGCTTTTTAGCTTCGAATCCGA  
 AATCAGCTTTTTTTTCGAAGTTCATGGAATTGGTTTGATTTCTTAATTGTAGCCGCAGGTCAT  
 ATATTTGCAGGTGCTCAATTTGTGACGGTTCTCCGTATTTTACGGGTTCTCAGGGTACTACG  
 GGCCATCTCAGTTGTTCCATCGTTGCGCAGGTTAGTTGATGCGTTGGTGATGACGATCCCGG  
 CGTTAGGAAACATCTTAATCTTGATGAGCATTTTCTTCTATATTTTTGCCGTTATCGGGACG  
 ATGTTATTTTACGATGTGTGCGCTGAATATTTTCGGTAATTTACAGCTTAGTTTGTAAACATT  
 GTTCCAAGTGGTCACGCTAGAGTCATGGGCGAGCGGCGTCATGCGACCAATTTTTGCCGAAG  
 TTCCGTGGTCTTGGCTTTATTTTGTGACGCTTTGTCTTAATCGGTACGTTTATCATCTTTAAC  
 TTGTTTATCGGTGTAATCGTCAATAACGTTGAAAAAGCAGAGTTAACGGACAATGAGGAAGA  
 TGGTGAAGCCGATGGGTAAAACAAGAAATCTCAGCCTTAAGAAAAGACGTAGCCGAGCTAA  
 AAAGCTTGCTTAAACAATTGAAAT**TGA**TGATACAAAAGAGGTTCTTAGTCAAATGTTGGGTCT  
AGA

# S5

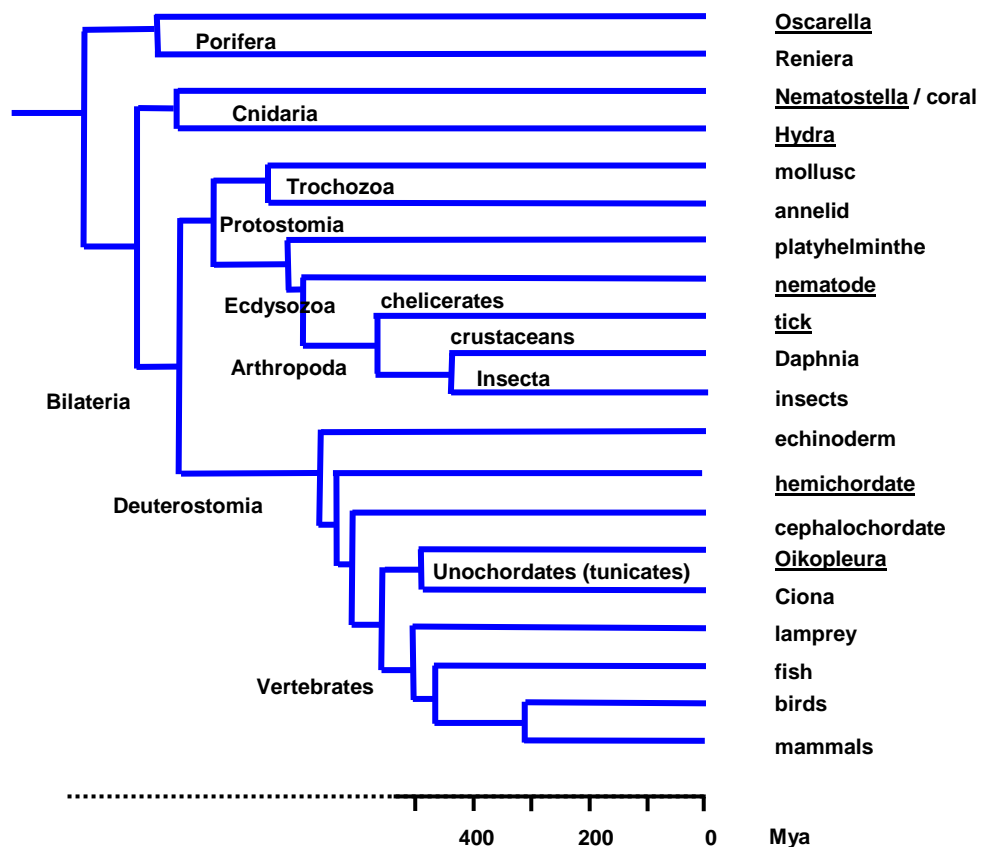

S6

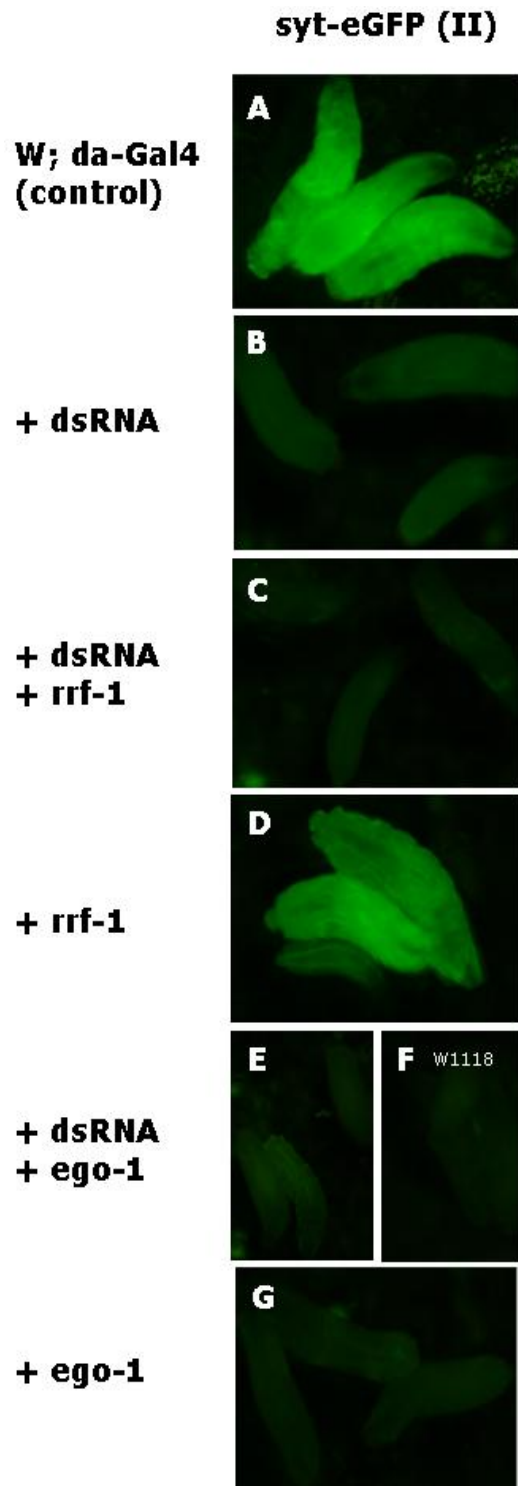

## S7

w; da-Gal4; UAST-ego-1 x w; +; UAS-syt.eGFP

↓

♂ w; da-Gal4/+; UAST-ego-1/ UAS-syt.eGFP + x ♀ w; If/CyO; MKRS/TM6B

↓

¼ of the progeny should be: w; da-Gal4 /CyO; UAS-syt.eGFP /TM6B

i.e. da-Gal4>> UAS-syt.eGFP, up to 100 1<sup>st</sup> or 2<sup>nd</sup> instar larvae were checked, however none of them were GFP fluorescent, indicating that silencing by EGO-1 is irreversible.

## S8

Three parallel crosses were set up as follow to test if RRF-1 and EGO-1 can independently silence hairpin *pblRNAi*<sup>4B(3.1)</sup>:

A: w; da-Gal4; + x w; *pblRNAi*<sup>4B(3.1)</sup>; +

All progeny were killed at the pupae stage

B: w; da-Gal4; UAST-rrf-1 x w; *pblRNAi*<sup>4B(3.1)</sup>; +

All progeny were killed at the pupae stage

C: w; da-Gal4; UAST-ego-1 x w; *pblRNAi*<sup>4B(3.1)</sup>; +

All progeny developed to the adult stage, indicating that *ego-1* rescued flies by directly silencing hairpin *pblRNAi*<sup>4B(3.1)</sup>

# S9

| Cross | Cross in Genotype                                                           | Number of Progenies with or without <i>CyO</i> phenotype      |     | Number of progenies with <i>pebble</i> gene silenced on the posterior compartment of the wing disc |
|-------|-----------------------------------------------------------------------------|---------------------------------------------------------------|-----|----------------------------------------------------------------------------------------------------|
| A     | <i>w; en-Gal4/CyO; UAST-rrf-1</i><br><i>w; pblRNAi<sup>4B(3.1)</sup>; +</i> | <i>CyO</i>                                                    | 102 | 0                                                                                                  |
|       |                                                                             | <i>en-Gal4&gt;&gt; pblRNAi<sup>4B(3.1)</sup> + UAST-rrf-1</i> | 10  | 10                                                                                                 |
| B     | <i>w; en-Gal4/CyO; UASP-ego-1</i><br><i>w; pblRNAi<sup>4B(3.1)</sup>; +</i> | <i>CyO</i>                                                    | 76  | 0                                                                                                  |
|       |                                                                             | <i>en-Gal4&gt;&gt; pblRNAi<sup>4B(3.1)</sup> + UASP-ego-1</i> | 8   | 8                                                                                                  |
| C*    | <i>w; en-Gal4/CyO; UAST-ego-1</i><br><i>w; pblRNAi<sup>4B(3.1)</sup>; +</i> | <i>CyO</i>                                                    | 147 | 0                                                                                                  |
|       |                                                                             | <i>en-Gal4&gt;&gt; pblRNAi<sup>4B(3.1)</sup> + UAST-ego-1</i> | 200 | 0                                                                                                  |

# S10

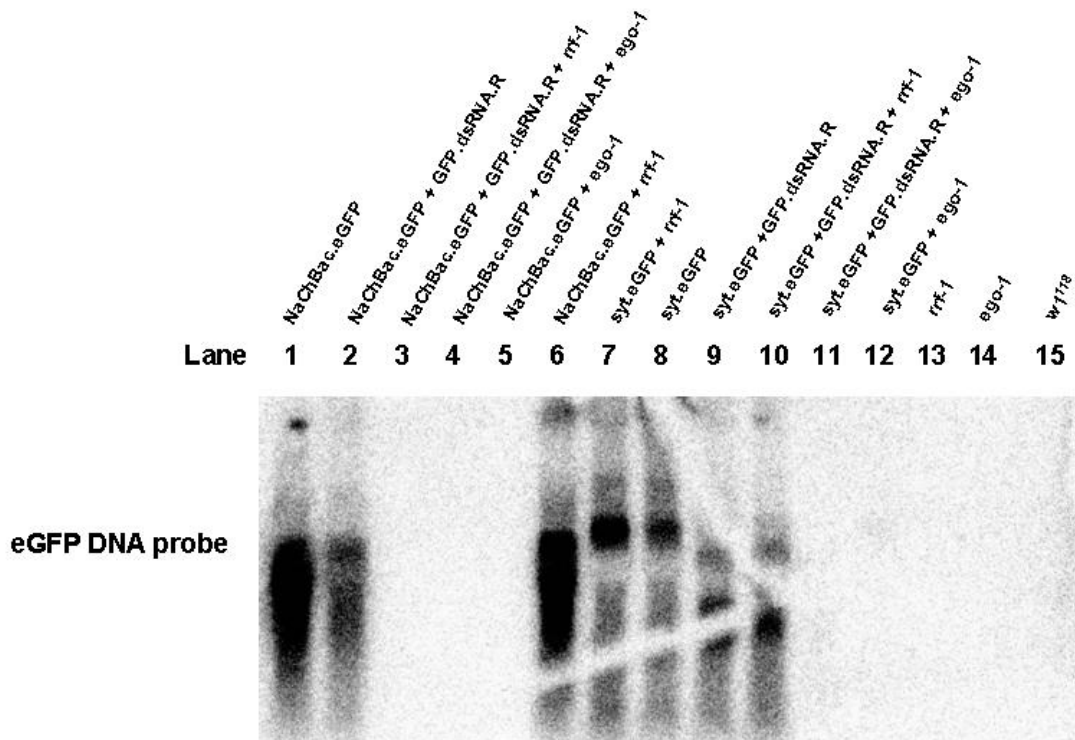

# S11

A

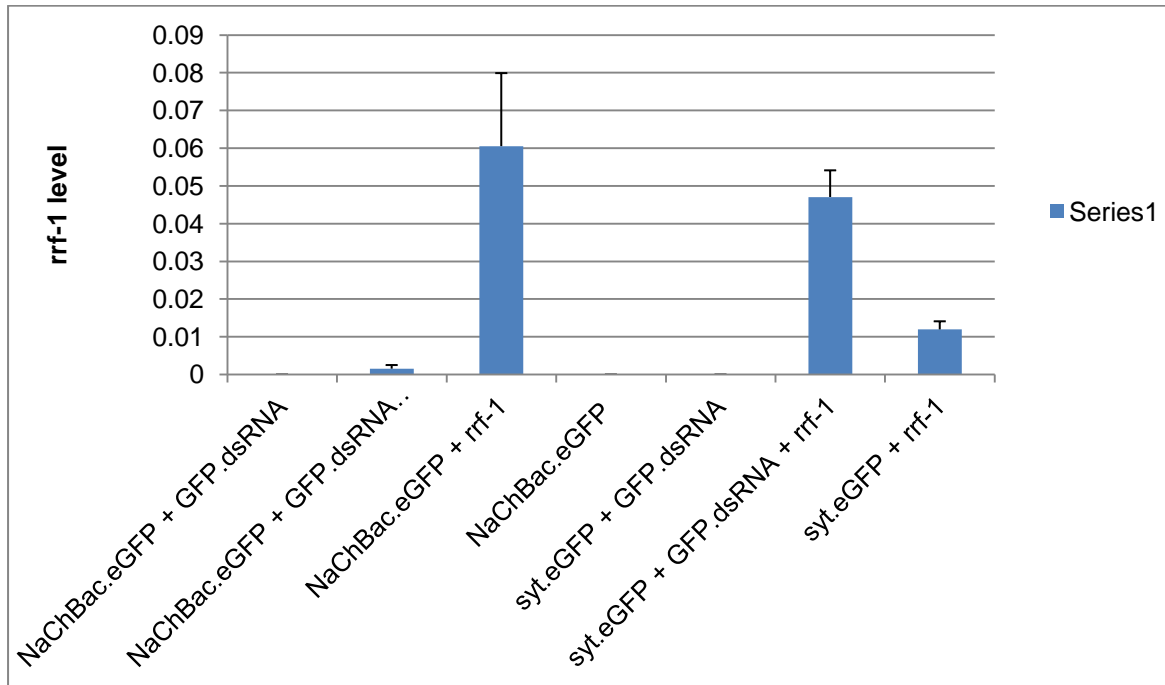

B

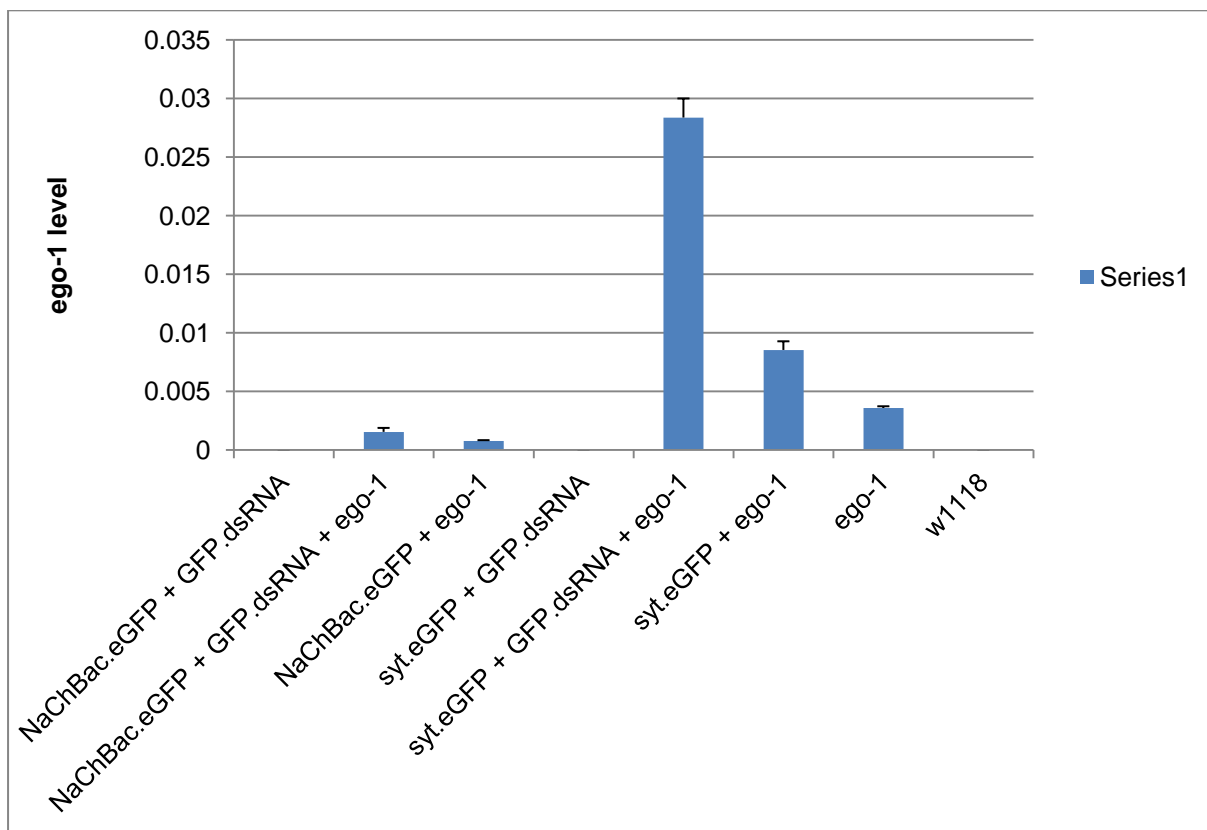

## S12

A

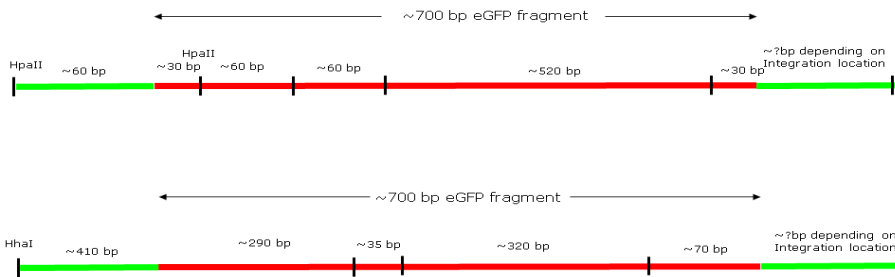

B

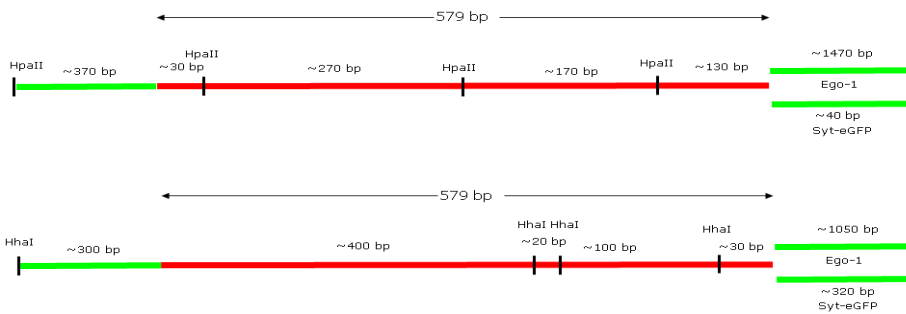

## S13

450

UAST promoter region (387)

C TCCGAGCGGAGTACTGTCTCCGAGCGGAGTACTGTCTCCGAGCGGAG

seq29 (212)

T TCCGAGCGGAGTACTGTCTCCGAGCGGAGTACTGTCTCCGAGCGGAG

Consensus (401)

TCCGAGCGGAGTACTGTCTCCGAGCGGAGTACTGTCTCCGAGCGGAG

500

UAST promoter region (437)

TACTGTCTCCGAGCGGAGACTCTAGCGAGCGCCGGAGTAAATAGAGG

seq29 (262)

TACTGTCTCCGAGCGGAGACTCTAGT GAGCGCCGGAGTAAATAGAGG



Consensus (451)

TACTGTCCCTCCGAGCGGAGACTCTAG GAGCGCCGGAGTA AAATAGAGG

550

UAST promoter region (487)

CGCTTCGTCTACGGAGCGACAATTCAATTCAAACAAGCAAAGTGAACACG

seq29 (312)

CGCTTCGTCTACGGAGCGACAATTCAATTCAAACAAGCAAAGTGAACACG

Consensus (501)

CGCTTCGTCTACGGAGCGACAATTCAATTCAAACAAGCAAAGTGAACACG

600

UAST promoter region (537)

TCGCTAAGCGAAAGCTAAGCAAATAAAACAAGCGCAGCTGAAACAAGCTAAA

seq29 (362)

TCGCTAAGCGAAAGCTAAGTAAATAAAATAAGTGTAGTTGAAATAAGTTAAA

Consensus (551)

TCGCTAAGCGAAAG TAAG AAATAAA AAG G AG TGAA AAG TAAA

650

UAST promoter region (587)

CAATCTGCAGTAAAGTGCAAGTTAAAGTGAATCAATTAAAAGTAAACAGC

seq29 (412)

TAAATTGTTAGTAAAGTGTAAGTTAAAGTGAATTAATTAAAAGTAAATTAGT

Consensus (601)

AAT TG AGTAAAGTG AAGTTAAAGTGAAT AATTAAAAGTAA AG

700

UAST promoter region (637)

AAACC AAGTAAATCAACTGCAACTATGAAATCTGCCAAGAAGTAATTAT

seq29 (462)

AAATT AAGTAAATTAATTGTAATTAATTGAAATTTGTTAAGAAGTAATTAT-

Consensus (651)

AA AAGTAAAT AA TG AA TA TGAAAT TG AAGAAGTAATTAT
